# Supplementary material for: Using User- and Marketer-Generated Content for Box Office Revenue Prediction: Differences Between Microblogging and Third-Party Platforms
Source: Atypon-hosted journal article supplement (doi:10.1287/isre.2018.0797), 2019-03-01
Supplement: isre.2018.0797.sm1.pdf [file isre.2018.0797.sm1.pdf]

## Appendix A. The Detailed MAPE Results

**Table A. MAPE for Each Movie**

| No. | Movie Title                               | MAPE  | No. | Movie Title                       | MAPE              |
|-----|-------------------------------------------|-------|-----|-----------------------------------|-------------------|
| 1   | <i>The Great Magician</i>                 | 0.012 | 31  | <i>Bunshinsaba</i>                | 0.024             |
| 2   | <i>Against War</i>                        | 0.015 | 32  | <i>Beijing Blues</i>              | 0.088             |
| 3   | <i>In-Laws New Year</i>                   | 0.011 | 33  | <i>Happy Hotel</i>                | Null <sup>1</sup> |
| 4   | <i>Perfect Two</i>                        | 0.012 | 34  | <i>Meet The In Laws</i>           | 0.053             |
| 5   | <i>Dinner Party</i>                       | 0.011 | 35  | <i>The Lion Roars 2</i>           | 0.026             |
| 6   | <i>Ultra Reinforcement</i>                | 0.021 | 36  | <i>HOLDING LOVE</i>               | 0.027             |
| 7   | <i>New Dragon Gate Inn</i>                | 0.016 | 37  | <i>The Amazing Spider-Man</i>     | 0.024             |
| 8   | <i>The Second Woman</i>                   | 0.056 | 38  | <i>Let it be</i>                  | 0.047             |
| 9   | <i>Night Fall</i>                         | 0.029 | 39  | <i>Tad, the Lost Explorer</i>     | 0.048             |
| 10  | <i>love on that day</i>                   | 0.068 | 40  | <i>Sad Fairy Tale</i>             | 0.021             |
| 11  | <i>LOST</i>                               | 0.063 | 41  | <i>White Deer Plain</i>           | 0.017             |
| 12  | <i>An Inaccurate Memoir</i>               | 0.024 | 42  | <i>The Tree in the Rain</i>       | 0.051             |
| 13  | <i>Design Of Death</i>                    | 0.017 | 43  | <i>The Woman in Black</i>         | 0.030             |
| 14  | <i>Inseparable</i>                        | 0.018 | 44  | <i>That Year School Ended</i>     | 0.039             |
| 15  | <i>Full Circle</i>                        | 0.044 | 45  | <i>The Assassins</i>              | 0.018             |
| 16  | <i>Shadows of Love</i>                    | 0.032 | 46  | <i>Dangerous Liaisons</i>         | 0.026             |
| 17  | <i>Hundred Years of A Floating City</i>   | 0.119 | 47  | <i>Looper</i>                     | 0.021             |
| 18  | <i>The Pirates! Band of Misfits</i>       | 0.082 | 48  | <i>Double Xposure</i>             | 0.015             |
| 19  | <i>Lacuna</i>                             | 0.115 | 49  | <i>Bait 3D</i>                    | 0.024             |
| 20  | <i>First Time</i>                         | 0.040 | 50  | <i>All For Love</i>               | 0.030             |
| 21  | <i>Million Dollar Crocodil</i>            | 0.043 | 51  | <i>Derrière les murs</i>          | 0.031             |
| 22  | <i>Double Trouble</i>                     | 0.085 | 52  | <i>Haunting Love</i>              | 0.027             |
| 23  | <i>Who in the mirror</i>                  | 0.041 | 53  | <i>Cold War</i>                   | 0.033             |
| 24  | <i>Black&amp;White Episode I</i>          | 0.039 | 54  | <i>Natural Born Lovers</i>        | 0.029             |
| 25  | <i>Painted Skin: The Resurrection</i>     | 0.022 | 55  | <i>Tears in Heaven</i>            | 0.035             |
| 26  | <i>Zhu zhu xia zhi jiong jiong wei ji</i> | 0.044 | 56  | <i>Chrysanthemum to The Beast</i> | 0.030             |
| 27  | <i>Mole manor 2</i>                       | 0.041 | 57  | <i>Back to 1942</i>               | 0.021             |
| 28  | <i>Caught in the Web</i>                  | 0.018 | 58  | <i>The Last Supper</i>            | 0.014             |
| 29  | <i>The Pork of Mu</i>                     | 0.017 | 59  | <i>Gordioda</i>                   | 0.035             |
| 30  | <i>THE FOUR</i>                           | 0.018 | 60  | <i>My Sassy Hubby</i>             | 0.016             |

---

<sup>1</sup> The  $ScreenRatio_{it}$  data of this movie are not available and thus we cannot derive its predicted revenue.
